# Supplementary material
Source: Springer Nature journal article supplement (https://www.springermedizin.de/resource/supplementary/12865_2009_271_MOESM1_ESM.pdf/9427650)

Crude  
Plasma

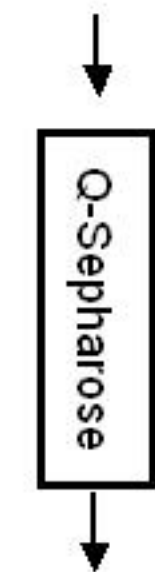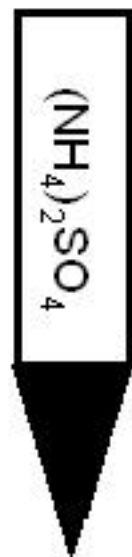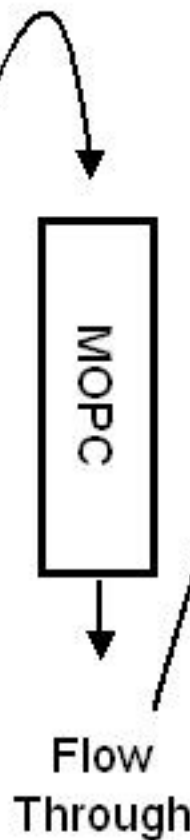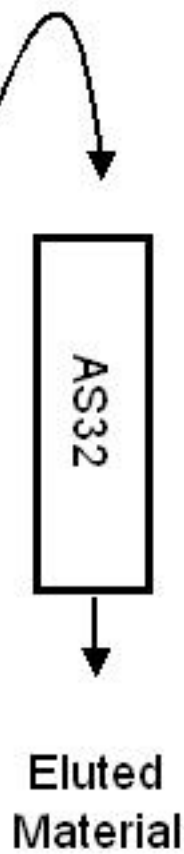

Supplement: MOESM1 [file 9427650]
